# Supplementary material
Source: PubMed Central journal article supplement (PMC9839529)
Supplement: NIHMS1855603-supplement-MMC1.pdf [file NIHMS1855603-supplement-MMC1.pdf]

**Supplemental information**

**Two distinct gut microbial pathways contribute to  
meta-organismal production of phenylacetylglutamine  
with links to cardiovascular disease**

**Yijun Zhu, Mohammed Dwidar, Ina Nemet, Jennifer A. Buffa, Naseer Sangwan, Xinmin S. Li, James T. Anderson, Kymberleigh A. Romano, Xiaoming Fu, Masanori Funabashi, Zeneng Wang, Pooja Keranahalli, Shawna Battle, Aaron N. Tittle, Adeline M. Hajjar, Valentin Gogonea, Michael A. Fischbach, Joseph A. DiDonato, and Stanley L. Hazen**

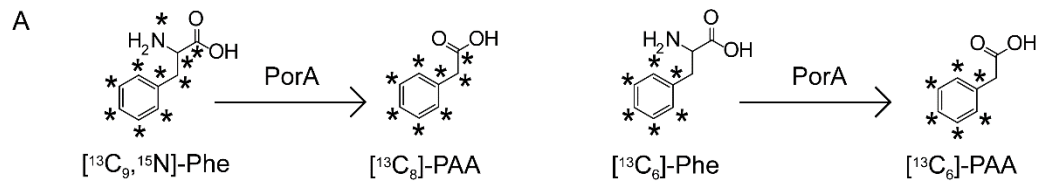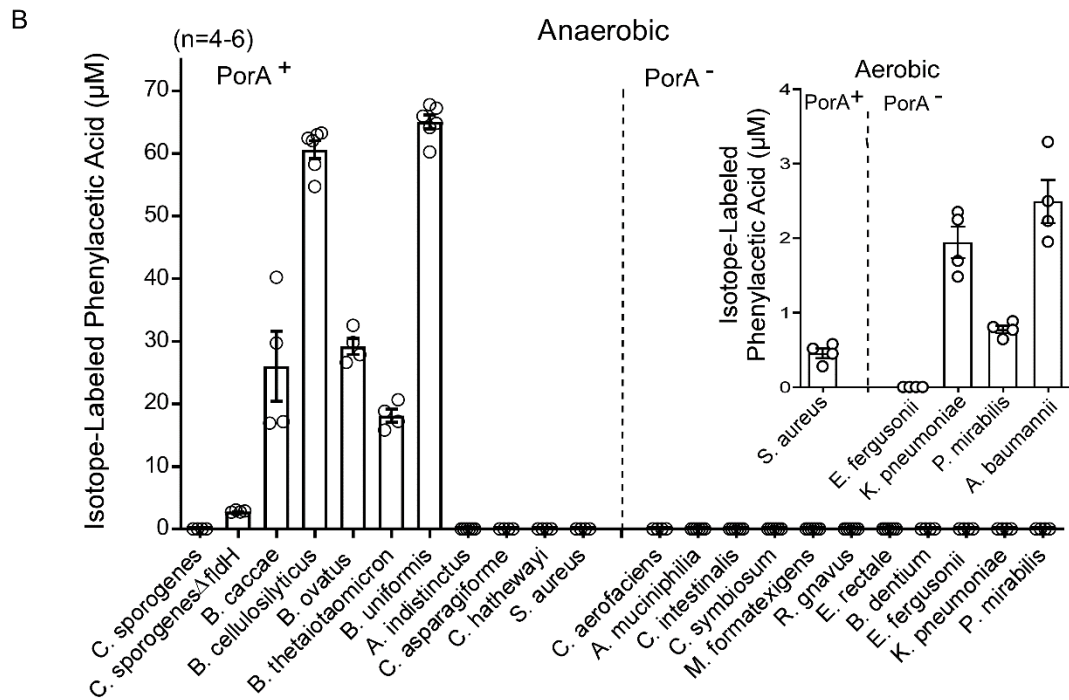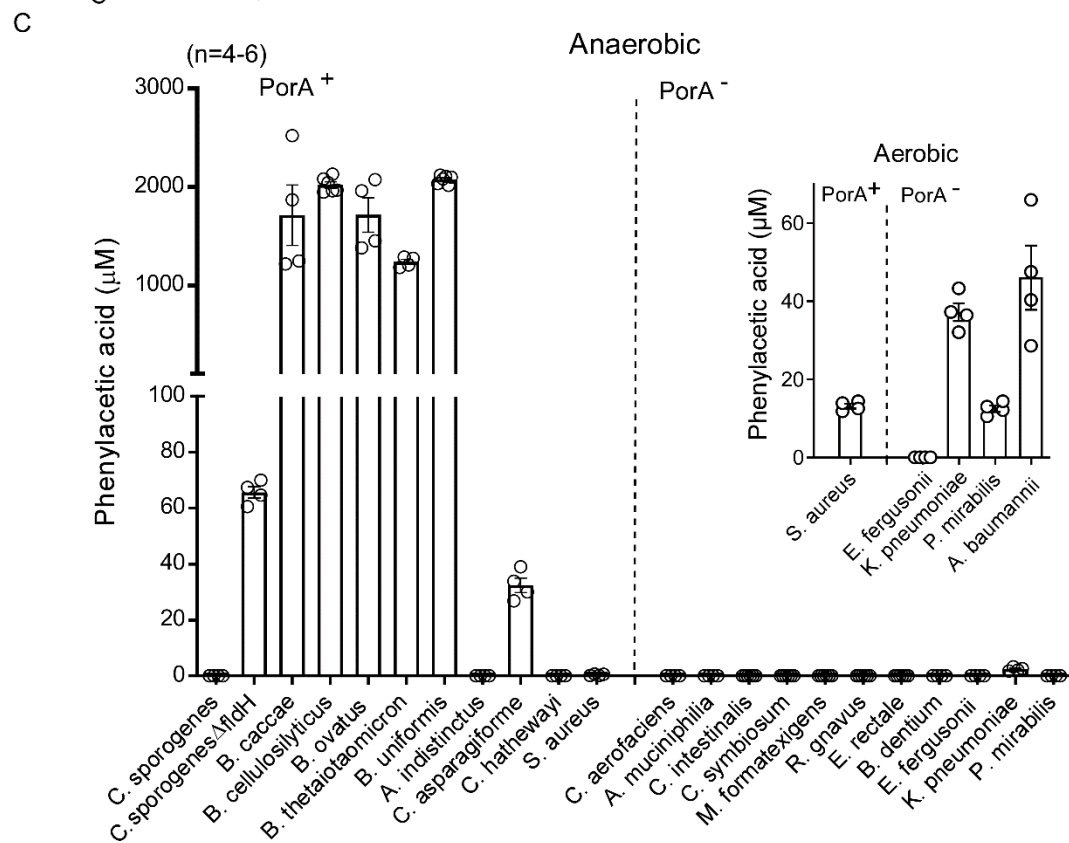

**Fig. S1. Screening for isotope-labeled and unlabeled phenylacetic acid (PAA) production among diverse panel of human commensal bacteria, related to main Figure 1.**

PAA and [ $^{13}\text{C}_8$ ]- or [ $^{13}\text{C}_6$ ]-PAA production from phenylalanine (Phe) and [ $^{13}\text{C}_9, ^{15}\text{N}$ ]-Phe or [ $^{13}\text{C}_6$ ]-Phe by human commensals grouped by the presence of PorA (CLOSPO\_00147, or related 2-oxoacid:ferredoxin oxidoreductases) protein homologues. All cultures were incubated under anaerobic conditions for 48 h before the supernatants were harvested and processed for LC-MS/MS analyses of the respective isotope-labelled PAA. For the facultative anaerobes, parallel experiments were performed under aerobic conditions. For *A. baumannii*, incubation was done under aerobic conditions only. **(A)** Structure of [ $^{13}\text{C}_9, ^{15}\text{N}$ ]-Phe and [ $^{13}\text{C}_6$ ]-Phe and the corresponding PAA isotopologues. **(B and C)** The production of both isotope-labeled and unlabeled PAA, respectively. n= 4~6 for each strain.

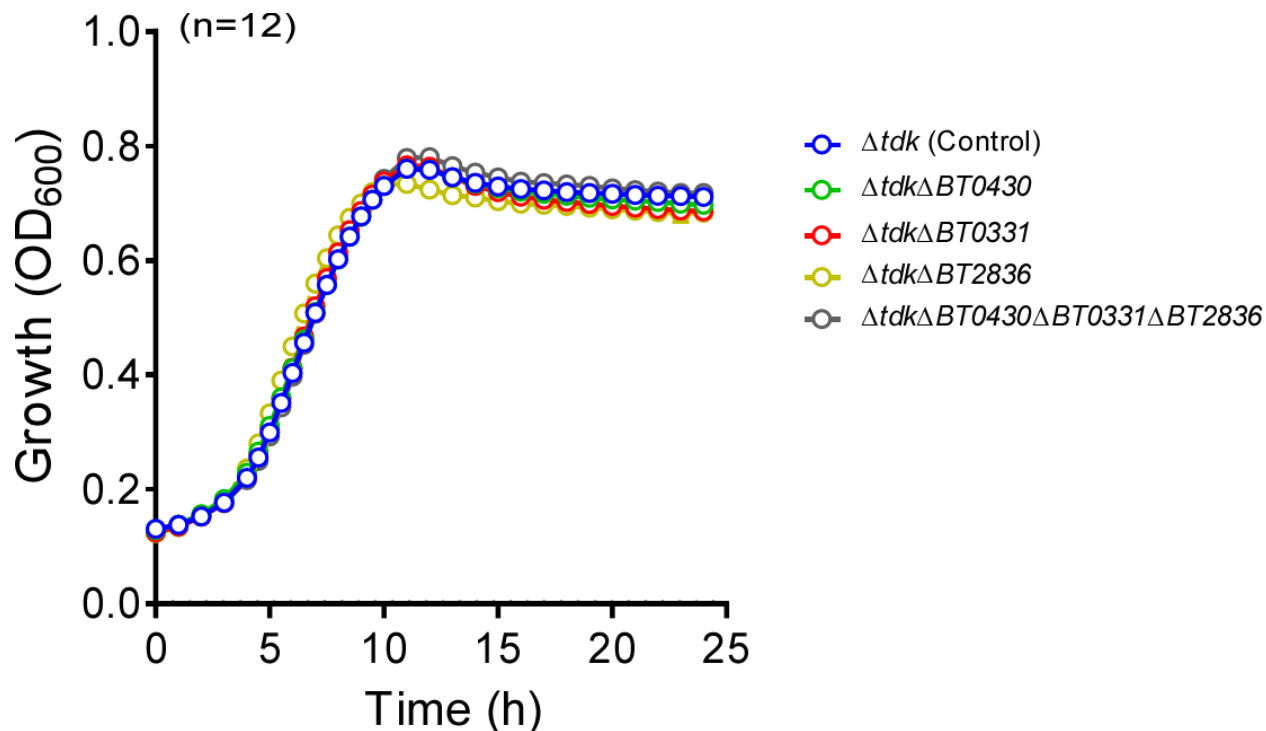

**Fig. S2. Growth curve of *B. thetaiotaomicron* mutants, related to main Figure 1.**

*B. thetaiotaomicron*  $\Delta tdk$ ,  $\Delta tdk\Delta BT0430$ ,  $\Delta tdk\Delta BT0331$ ,  $\Delta tdk\Delta BT2836$  and  $\Delta tdk\Delta BT0430\Delta BT0331\Delta BT2836$  knockout mutants were cultured in BHI media supplemented with 100  $\mu\text{M}$  [ $^{13}\text{C}_9$ ,  $^{15}\text{N}$ ]-Phe at 37  $^\circ\text{C}$  under anaerobic condition in 96-well plate. For each mutant, 4 independent cultures were prepared, and each was subcultured in 3 wells. Data points represent the mean $\pm$ SE from the 12 wells for each mutant.

**A**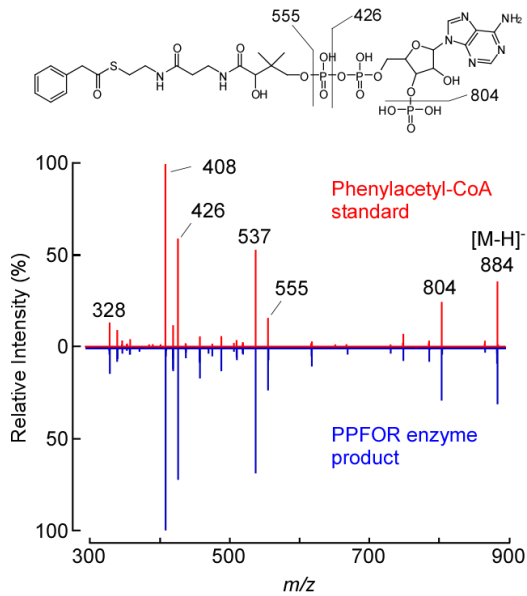**B**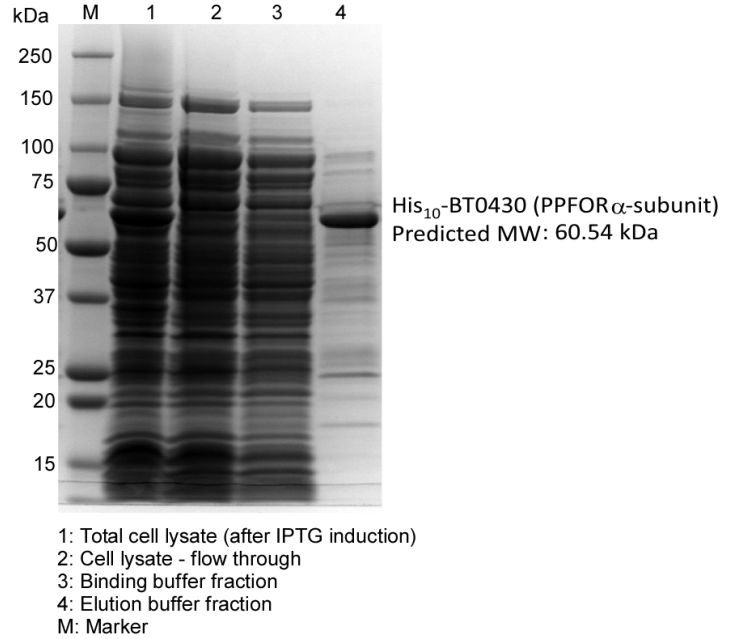**C**

In-solution digestion of *E. coli* cell lysate containing recombinant PPFOR (BT0430/BT0429)

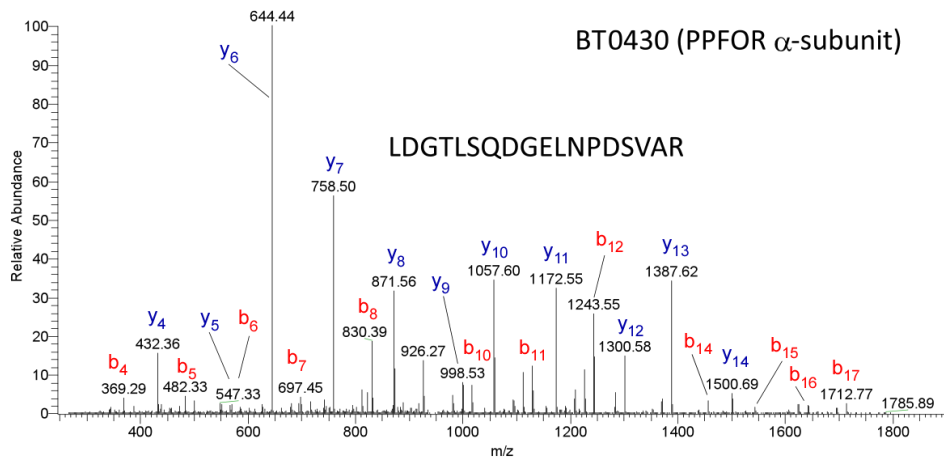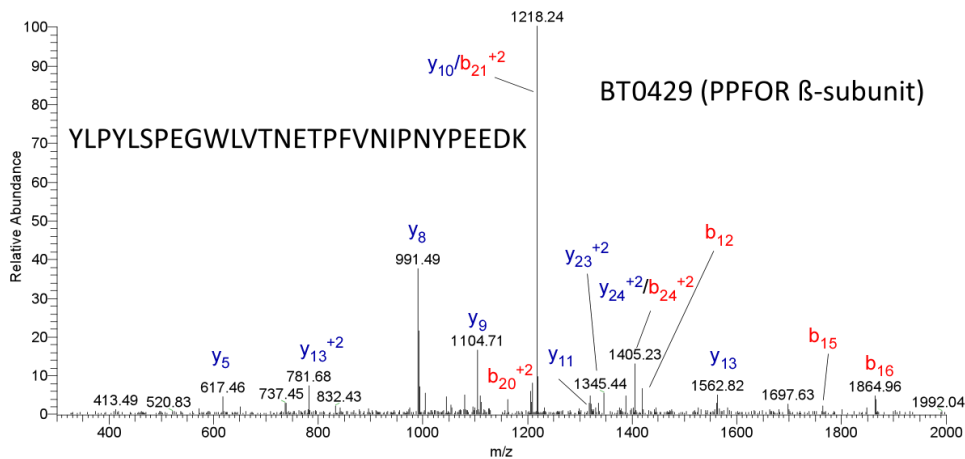

**Fig. S3. Phenylacetyl-CoA is the product of phenylpyruvate:ferredoxin oxidoreductase (PPFOR) on phenylpyruvate, related to main Figure 1.**

**(A)** Collision-induced dissociation (CID) spectra of phenylacetyl-CoA standard (red) and the enzymatic product of the recombinant PPFOR (blue).

**(B)** Coomassie-blue staining and imaging of denaturing SDS-PAGE gel showing the induced *E. coli* cell lysate containing the recombinant His<sub>10</sub>-tagged  $\alpha$ -subunit of PPFOR before and after purification using Ni-NTA column. Both  $\alpha$  and  $\beta$  subunits of *B. thetaiotaomicron* PPFOR (BT0430/BT0429) were expressed in *E. coli* BL21 (DE3), but only BT0430 ( $\alpha$ -subunit) was labelled on its *N*-terminus with His<sub>10</sub>-tag and therefore can be observed on the gel after Ni-NTA column purification.

**(C)** Trypsin digestion of the cut BT0430 gel band and in-solution trypsin digestion of the induced *E. coli* cell lysate followed by LC-MS/MS proteomics analysis confirmed the expression of both  $\alpha$  and  $\beta$  subunits in the induced *E. coli*. A total of 24 and 2 peptides corresponding to recombinant BT0430 and BT0429, respectively, were observed in the trypsin digestion of the cut BT0430 gel band, and the induced *E. coli* cell lysate (see also Table S4). The MS spectrum of one representative peptide from each subunit is shown.

*P. mirabilis* Loss-of-PPDC function (n=4)

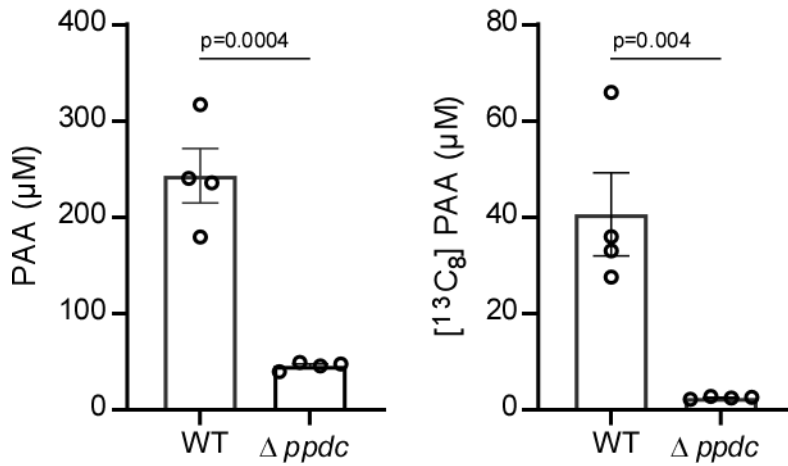

**Fig. S4. Phenylacetic acid (PAA) and [<sup>13</sup>C<sub>8</sub>]-PAA production by *P. mirabilis* wild-type and  $\Delta$ HMPREF0693\_2975 mutant ( $\Delta$ ppdc) in LB media supplemented with [<sup>13</sup>C<sub>9</sub>,<sup>15</sup>N]-phenylalanine under aerobic condition, related to main Figure 3.**

Supernatant was sampled after 48 hours of incubation. PAA and [<sup>13</sup>C<sub>8</sub>]-PAA were quantified using LC-MS/MS. Data points represent the mean $\pm$ SE from four independent replicates.

Significance was determined using Student's *t*-test.

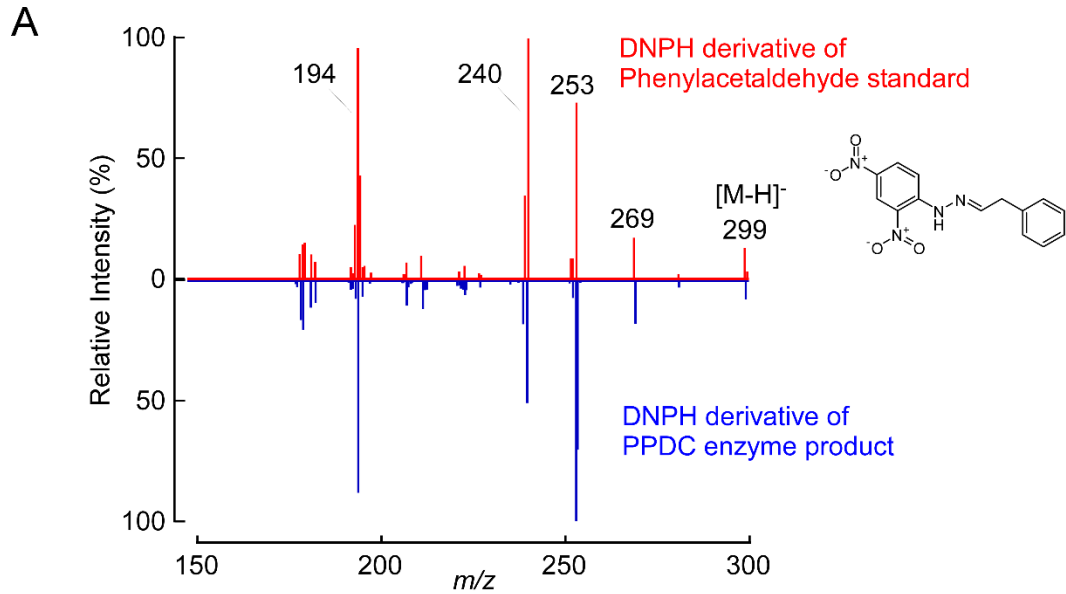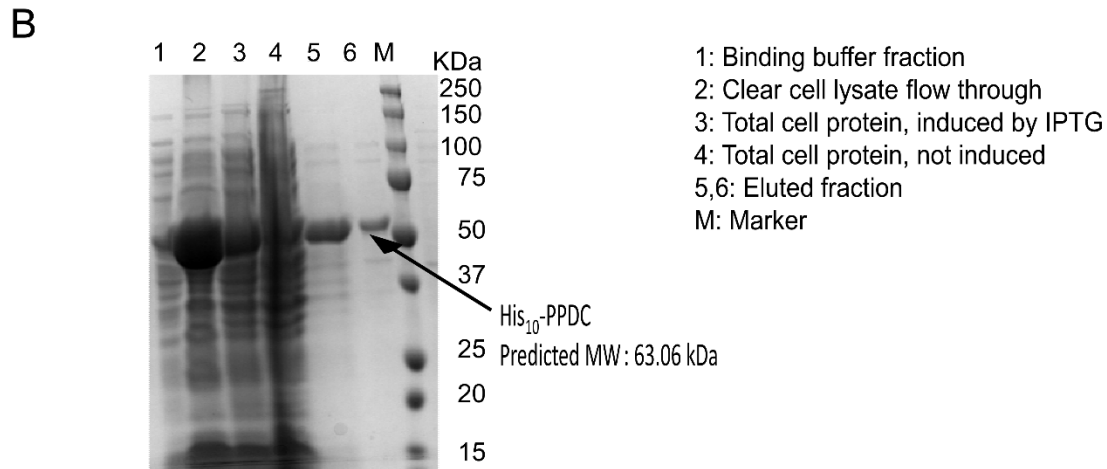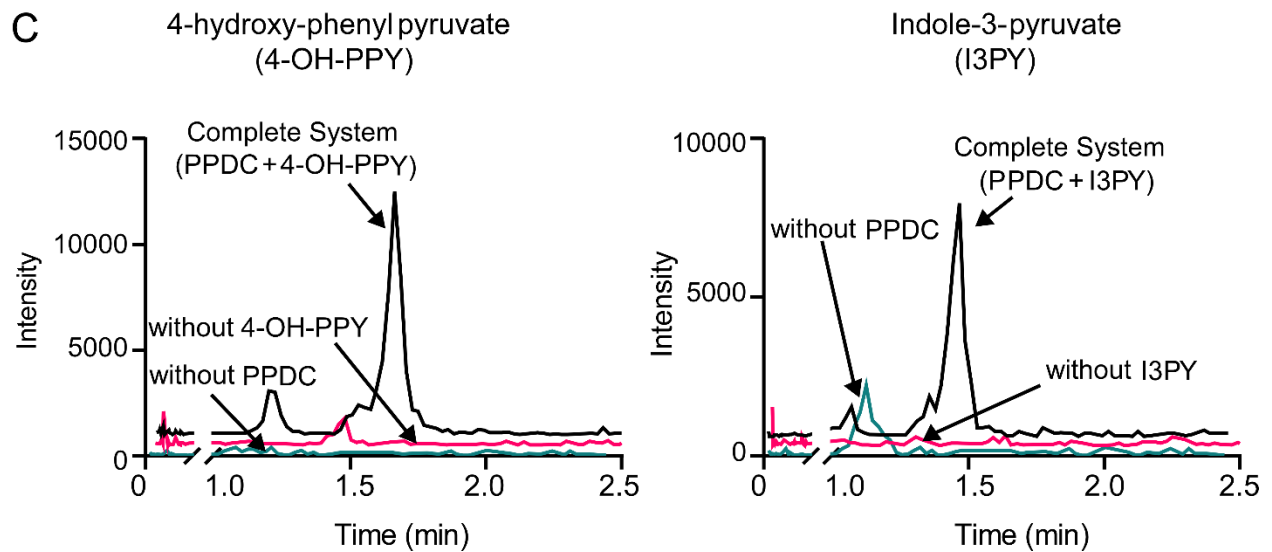



**Fig. S5. Phenylacetaldehyde is the product of phenylpyruvate decarboxylase (PPDC) on phenylpyruvate while 4-hydroxyphenylacetaldehyde and indoleacetaldehyde are the products of 4-hydroxyphenylpyruvate (4-OH-PPY) and indole-3-pyruvate (I3PY), respectively, related to main Figure 3.**

**(A)** CID fragmentation spectra of the 2,4-dinitrophenylhydrazone (DNPH) derivative of phenylacetaldehyde standard (red) and the enzymatic product of the recombinant PPDC (blue).

**(B)** Coomassie blue staining and imaging of denaturing SDS-PAGE gel showing the induced *E. coli* BL21 (DE3) cell lysate containing the recombinant His<sub>10</sub>-tagged PPDC before and after purification using Ni-NTA column.

**(C)** 4-Hydroxyphenylacetaldehyde and indoleacetaldehyde were derivatized with DNPH and the signature parent-daughter ion transitions for their hydrazones were monitored by LC-MS/MS:  $m/z$  315.2→149.1 for 4-OH-phenylacetaldehyde-DNPH, and  $m/z$  338.3→172.2 for indoleacetaldehyde-DNPH derivatives.

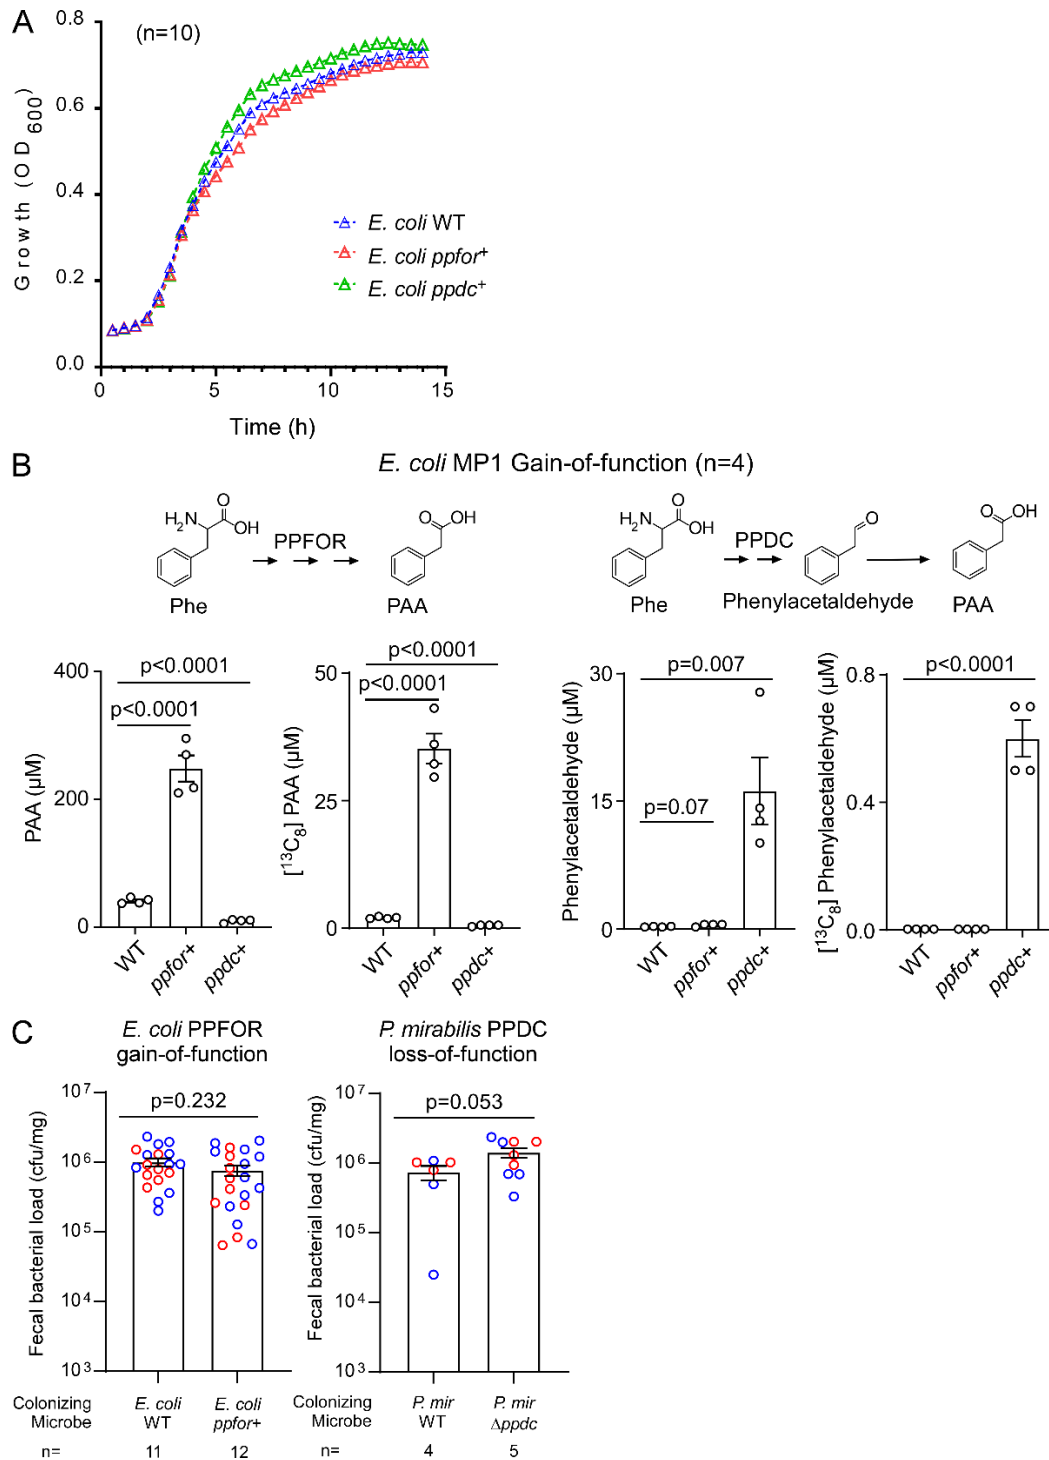

**Fig. S6.** PPFOR and PPDC gain-of-function in *E. coli* MP1 and colonization efficiency of wild-type strains and mutants of *E. coli* MP1, and *P. mirabilis* in gnotobiotic mice studies, related to main Figure 5.

**(A)** The two knock-in mutants *E. coli ppfor*<sup>+</sup>, and *E. coli ppdc*<sup>+</sup> showed similar growth rate as the wild-type *E. coli* MP1. All three strains were cultured in LB media aerobically in a 96 well-plate and their growth was monitored over time. Data points represent the mean±SE from 10 wells for each.

**(B)** Chromosomal expression of *BT0429/BT0430* genes (The two subunits for *B. thetaiotaomicron* PPFOR enzyme) in *E. coli* MP1 but not *HMPREF0693\_2975* (coding for *P. mirabilis* PPDC enzyme) enabled the full conversion of phenylalanine (Phe) to phenylacetic acid (PAA). Similar results were obtained when following isotopically labelled phenylalanine. PPDC knock-in, however, enabled the conversion of phenylalanine to phenylacetaldehyde. Data is shown as individual data points and mean±SE. Significance was determined using Student's *t*-test.

**(C)** Germ-free mice were randomized and inoculated with either wild-type *E. coli* MP1 versus its gain-of-function mutant *E. coli ppfor*<sup>+</sup>, while in an independent experiment, germ-free mice were inoculated with wild-type *P. mirabilis* or its loss-of-function mutant *P. mirabilis*  $\Delta$ *HMPREF0693\_2975* ( $\Delta$ *ppdc*) as explained in the methods. Fecal samples were taken at day 4 and day 7 after colonization, weighed, diluted then plated on LB agar plates for counting. Day 4 and day 7 samples are shown as blue and red open circles, respectively. "n" represents the number of mice in each group. For some mice, fecal samples were only able to be collected at one time point (either 4 or 7 days). Bars represent mean±SE. Significance was determined using Student's *t*-test.

*E. coli* cell lysate expressing recombinant *B. thtaiotaomicron* PPFOR

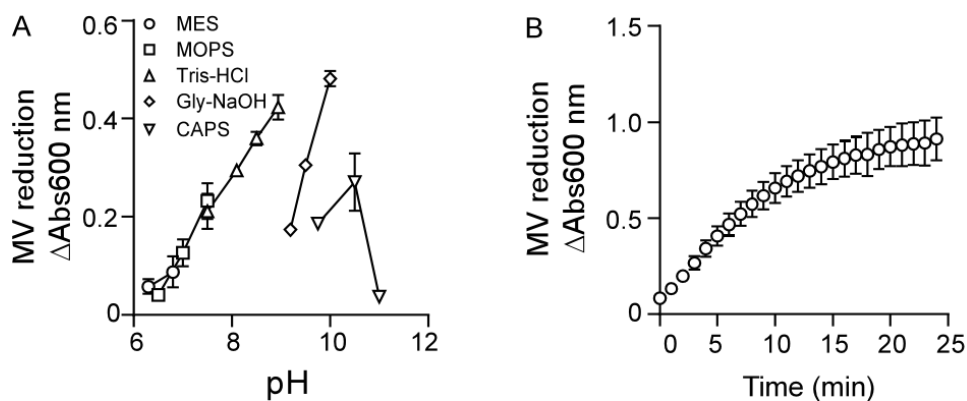

Purified recombinant *P. mirabilis* PPDC

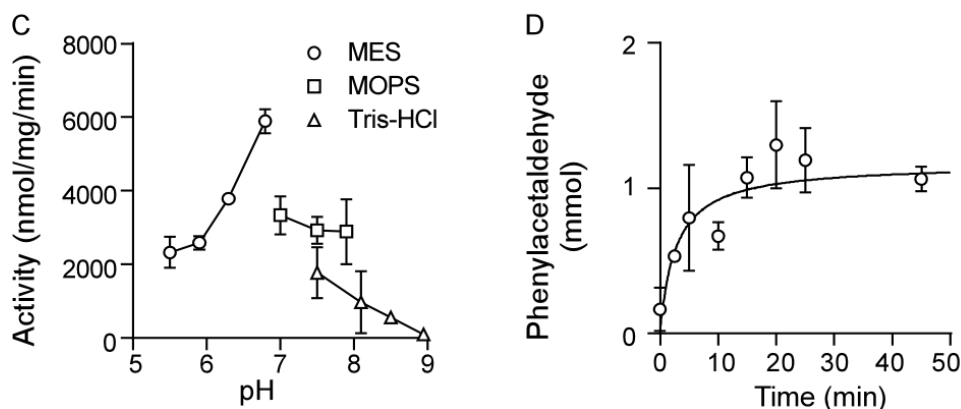

**Fig. S7. Optimization of recombinant PPFOR and PPDC enzymatic reaction condition, related to main Figures 1 and 3.**

**(A, B) Optimization of reaction conditions for induced *E. coli* BL21 (DE3)/ pET16b-PPFOR cell lysate harboring the recombinant PPFOR. (A) Enzyme activity at different pH and buffer system. (B) Reaction time course for ~50  $\mu$ g of induced *E. coli* BL21 (DE3)/ pET16b-PPFOR cell lysate in 100  $\mu$ l of 100 mM Glycine-NaOH buffer, pH 10.5.**

**(C, D) Optimization of reaction conditions for the recombinant *P. mirabilis* PPDC after expressing in and purifying from *E. coli* BL21 (DE3). (C) Enzyme activity at different pH and buffer system. (D) Reaction time course for ~2  $\mu$ g of PPDC in 100  $\mu$ l of MES buffer, pH 6.8.**

All buffers were used at 100 mM final concentration. MOPS, 3-morpholin-4-ylpropane-1-sulfonic acid; CAPS, N-cyclohexyl-3-aminopropanesulfonic acid; MES, 2-(N-morpholino) ethanesulfonic acid.

**Table S2. Substrate specificity of recombinant PPFOR and PPDC, related to main Figures 1, and 3.**

| Structure/name                                                                                                       | Relative activity (%)                      |                                      | Structure                                                                                                              | Relative activity (%)                      |                                      |
|----------------------------------------------------------------------------------------------------------------------|--------------------------------------------|--------------------------------------|------------------------------------------------------------------------------------------------------------------------|--------------------------------------------|--------------------------------------|
|                                                                                                                      | Rec. PPFOR<br>( <i>B.thetaiotaomicon</i> ) | Rec. PPDC<br>( <i>P. mirabilis</i> ) |                                                                                                                        | Rec. PPFOR<br>( <i>B.thetaiotaomicon</i> ) | Rec. PPDC<br>( <i>P. mirabilis</i> ) |
| 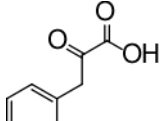<br>Phenylpyruvate                  | 100.00±8.66                                | 100.00±11.03                         | <br>Methyl 2-oxopropanoate            | 10.51±7.75                                 | 20.29±2.15                           |
| <br>Pyruvic acid                    | 2.12±3.68                                  | 91.94±3.69                           | <br>Ethyl thiophene-2-glyoxylate     | 2.87±1.46                                  | 19.04±16.56                          |
| <br>Benzoylformic acid             | 13.06±8.28                                 | 73.78±15.52                          | <br>4-methylthio-2-oxobutanoic acid | 7.22±1.21                                  | 16.31±14.12                          |
| <br>3-methyl-2-oxovaleric acid    | 7.54±2.26                                  | 57.91±9.39                           | <br>Ethyl pyruvate                  | 3.18±0.55                                  | 4.75±0.73                            |
| <br>Ethyl 2-oxo-4-phenylbutanoate | 11.78±4.49                                 | 43.85±6.60                           | <br>Indolepyruvate                 | 24.31±9.04                                 | Not determined*                      |
| <br>2-oxobutanoic acid            | 3.93±0.66                                  | 34.43±1.52                           | <br>4-hydroxyphenylpyruvate        | 24.18±9.09                                 | Not determined*                      |

Note: Both *B. thetaiotaomicon* PPFOR (BT0430/0429) and *P. mirabilis* PPDC (HMPREF0693\_2975) were cloned and expressed from pET16b plasmid in *E. coli* BL21 (DE3). For the recombinant PPFOR, the reaction was performed using the induced *E. coli* cell lysate and the listed substrates and the activity on various substrates were determined by the reduction of methyl viologen monitored by the change in

absorbance at 600 nm anaerobically as described in the methods. For the recombinant PPDC, the reaction was done using the purified enzyme, and the activity was estimated by the reduction of NAD<sup>+</sup> monitored by the change in the absorbance at 340 nm in the presence of aldehyde dehydrogenase under aerobic condition. The relative activity is expressed as a percentage of the highest activity in the presence of phenylpyruvate.

\* PPDC showed activity on indolepyruvate and 4-hydroxyphenylpyruvate, but relative activity was not determined as indolepyruvate and 4-hydroxyphenylpyruvate have a high background absorbance at 340 nm. The putative products, indoleacetaldehyde and 4-hydroxyphenylacetaldehyde, were therefore examined using LC-MS/MS after derivatization with 2,4-dinitrophenylhydrazine (see Methods). The putative products, indoleacetaldehyde-2,4-dinitrophenylhydrazone and 4-hydroxyphenylacetaldehyde-2,4-dinitrophenylhydrazone were detected with their predicted signature parent to daughter transition (Fig. S5). Because the authentic indoleacetaldehyde or 4-hydroxyphenylacetaldehyde to build standard curve were not commercially available, PPDC relative activity on Indolepyruvate or 4-hydroxyphenylpyruvate was not determined.

**Table S4. Proteomics analyses of the recombinant PPFOR (BT0430/BT0429) expressed in *E. coli* BL21 (DE3), related to main Figure 1.**

| Protein accession | [M+H]   | m/z      | z | $\Delta m$ (ppm) | Ret Time (Min) | Residues | Sequence                       | Xcorr Scores                     |                                                     |
|-------------------|---------|----------|---|------------------|----------------|----------|--------------------------------|----------------------------------|-----------------------------------------------------|
|                   |         |          |   |                  |                |          |                                | Digestion of the BT0430 gel band | In-solutin digestion of crude <i>E. coli</i> lysate |
| Q8AAN4            | 779.39  | 779.3933 | 1 | -0.08            | 21.1738        | 213-218  | QDEFIK                         | 1.59                             | -                                                   |
| Q8AAN4            | 820.49  | 820.4923 | 1 | -0.51            | 28.9885        | 299-306  | GYLGIGIK                       | 1.57                             | -                                                   |
| Q8AAN4            | 862.55  | 431.7791 | 2 | -0.07            | 22.2586        | 206-212  | YKVLAR                         | 2.07                             | -                                                   |
| Q8AAN4            | 915.53  | 458.2688 | 2 | 0.52             | 24.5511        | 263-270  | IGQYPLPK                       | 2.41                             | -                                                   |
| Q8AAN4            | 932.49  | 466.7473 | 2 | 0.26             | 22.1575        | 156-163  | TGEPILMoR                      | 2.51                             | -                                                   |
| Q8AAN4            | 934.50  | 467.7534 | 2 | 0.32             | 16.2782        | 228-238  | YIDGPNKK                       | 2.17                             | -                                                   |
| Q8AAN4            | 1024.46 | 512.7332 | 2 | 0.82             | 17.1684        | 219-227  | ASEESPYNK                      | 2.97                             | -                                                   |
| Q8AAN4            | 1043.62 | 348.5464 | 3 | -0.03            | 20.7019        | 263-271  | IGQYPLPKK                      | 2.82                             | -                                                   |
| Q8AAN4            | 1146.60 | 573.8061 | 2 | 0.14             | 20.6321        | 517-525  | RECIQTLAR                      | 3.48                             | -                                                   |
| Q8AAN4            | 1198.73 | 400.2485 | 3 | 0.23             | 27.1559        | 296-306  | HLKGYLGIGIK                    | 3.58                             | -                                                   |
| Q8AAN4            | 1325.70 | 663.3547 | 2 | 0.06             | 41.0946        | 359-369  | DMYITLTVLK                     | -                                | 2.8                                                 |
| Q8AAN4            | 1341.70 | 671.3524 | 2 | 0.34             | 37.6739        | 359-369  | DMoYITLTVLK                    | 2.67                             | -                                                   |
| Q8AAN4            | 1428.69 | 714.8466 | 2 | -0.15            | 31.4391        | 60-73    | TAMoEAALGMSFVGK                | 4.52                             | -                                                   |
| Q8AAN4            | 1444.68 | 722.8447 | 2 | 0.76             | 28.3369        | 60-73    | TAMoEAALGMoSFVGK               | 4.87                             | -                                                   |
| Q8AAN4            | 1617.85 | 809.4274 | 2 | -0.52            | 35.522         | 503-516  | EEIEYNGVSVIIPR                 | 4.67                             | 4.1                                                 |
| Q8AAN4            | 1749.93 | 583.982  | 3 | -0.05            | 33.8578        | 470-485  | IESICIGLVDPAHIR                | 3.25                             | -                                                   |
| Q8AAN4            | 1761.84 | 881.4236 | 2 | -0.23            | 22.9306        | 179-193  | EQKPQNSISFSEDPR                | 3.28                             | 2.99                                                |
| Q8AAN4            | 1784.83 | 595.6164 | 3 | 0.47             | 24.8847        | 213-227  | QDEFIKASEESPYNK                | 4.07                             | -                                                   |
| Q8AAN4            | 1886.91 | 943.9578 | 2 | -0.35            | 29.5298        | 311-328  | LDGTLSDGELNPDSVAR              | 5.69                             | 5.2                                                 |
| Q8AAN4            | 2100.03 | 1050.519 | 2 | -0.14            | 27.9465        | 309-328  | GRLDGTLSQDGELNPDSVAR           | 6.26                             | -                                                   |
| Q8AAN4            | 2106.01 | 702.6752 | 3 | 0.11             | 30.9603        | 81-100   | HVGMoNVAADCVFNSAITGVK          | 4.96                             | -                                                   |
| Q8AAN4            | 2427.12 | 1214.064 | 2 | 0.07             | 28.1527        | 101-123  | GGLIVIAADDPMSHSSQNEQDSR        | -                                | 5.96                                                |
| Q8AAN4            | 2443.12 | 815.0434 | 3 | 0.09             | 27.0526        | 101-123  | GGLIVIAADDPMSMoHSSQNEQDSR      | 5.4                              | -                                                   |
| Q8AAN4            | 2801.43 | 934.4811 | 3 | 0.4              | 45.0584        | 270-295  | QLLQLVESCDEILVLEDGQPFVEK       | -                                | 5.35                                                |
| Q8AAN5            | 1540.86 | 514.2911 | 3 | 0.49             | 27.3779        | 54-68    | ISDKPIASDLIPSGK                | -                                | 2.85                                                |
| Q8AAN5            | 3424.66 | 1142.226 | 3 | 0.59             | 46.4015        | 86-111   | YLPYLSPEGWLVLTNETPFVNIPNYPEEDK | -                                | 2.89                                                |

Peptides in blue correspond to BT0430 (PPFOR  $\alpha$ -subunit)

Peptides in red correspond to BT0429 (PPFOR  $\beta$ -subunit)
